# Supplementary material
Source: Copernicus journal article supplement (doi:10.5194/egusphere-2026-2656)
Supplement: Supplementary file 1 [file egusphere-2026-2656-supplement.pdf]

**Table S1.** Remote sensing products used in this study

| Platform | Overpass [hr]       | Sensor  | Swath [km] | Pixel [km] | Product                  | AOD <sup>1</sup> 550nm | Short name               | References                                             |
|----------|---------------------|---------|------------|------------|--------------------------|------------------------|--------------------------|--------------------------------------------------------|
| Terra    | 10:30AM             | MODIS   | 2330       | 1          | Dark Target C6.1         | R                      | Terra-DT                 | Remer et al. (2005)                                    |
|          |                     |         |            |            | Deep Blue C6.1           | I/E                    | Terra-DB                 | Hsu et al. (2013, 2019); Sayer et al. (2019)           |
|          |                     |         |            |            | MAIAC v2.0<br>BAR v1.0   | E<br>R                 | Terra-MAIAC<br>Terra-BAR | Lyapustin et al. (2018)<br>Lipponen et al. (2018)      |
| ENVISAT  | 10:30AM             | AATSR   | 500        | 1          | ADV/ASV Ver2.30          | R                      | AATSR-ADV                | Sogacheva et al. (2017)                                |
|          |                     |         |            |            | ORAC v03.20              | R                      | AATSR-ORAC               | Thomas et al. (2009)                                   |
|          |                     |         |            |            | AARDVARC v4.21           | R                      | AATSR-SU                 | North et al. (1999); North (2002); Bevan et al. (2012) |
| Aqua     | 1:30PM              | MODIS   | 2330       | 1          | Dark Target C6.1         | E                      | Aqua-DT                  | see Terra-DT                                           |
|          |                     |         |            |            | Deep Blue C6.1           | I/E                    | Aqua-DB                  | see Terra-DB                                           |
|          |                     |         |            |            | MAIAC v2.0               | E                      | Aqua-MAIAC               | see Terra-MAIAC                                        |
|          |                     |         |            |            | BAR v1.0                 | R                      | Aqua-BAR                 | see Terra-BAR                                          |
| SeaSTAR  | 0:20PM              | SeaWiFS | 1502       | 13.5       | Deep Blue<br>& SOARv004  | I/E<br>R               | SeaWiFS                  | Hsu et al. (2013); Sayer et al. (2012a, b)             |
| noaa18   | 2:58PM              | AVHRR   | 2900       | 8.8        | Deep Blue<br>& SOAR v001 | E<br>R                 | AVHRR                    | Hsu et al. (2017); Sayer et al. (2017)                 |
| AURA     | 1:30PM              | OMI     | 2600       | 18         | OMAERUV v1.7.1           | E                      | OMAERUV                  | Ahn et al. (2014); Jethva et al. (2014)                |
| PARASOL  | 1:30PM <sup>2</sup> | POLDER  | 1600       | 6.18       | POLDER-GRASP-M v1.2      | I                      | POLDER-GRASP             | Dubovik et al. (2011); Chen et al. (2020)              |
| PARASOL  | 1:30PM <sup>2</sup> | POLDER  | 1600       | 6.18       | POLDER-RemoTAP           | I                      | POLDER-RemoTAP           | Lu et al. (2022); Hasekamp et al. (2024)               |

1) Interpolated or Extrapolated to 550 nm, depending on surface type; or Retrieved at 550 nm.

2) PARASOL started drifting away from Aqua at the end of 2009.

**Table S2.** AEROCOM models used in this study

| Model full name          | Model short name | Resolution latitude° × longitude° | Comments      | References                                                        |
|--------------------------|------------------|-----------------------------------|---------------|-------------------------------------------------------------------|
| PNNL CAM5.3              | CAM5             | 1.875 × 2.5                       |               | Liu et al. (2012); Ghan et al. (2012)                             |
| CAM5.3-Oslo              | CAM-Oslo         | 0.9735 × 1.25                     |               | Kirkevåg et al. (2018)                                            |
| ECHAM6.3-HAM2.3          | ECHAM-HAM        | 1.875 × 1.875                     | a.k.a. NorESM | Stier et al. (2005); Lohmann et al. (2007); Zhang et al. (2012)   |
| ECHAM6-SALSA             | ECHAM-SALSA      | 1.875 × 1.875                     |               | Stier et al. (2005); Bergman et al. (2012); Kokkola et al. (2018) |
| ECMWF-IFS-CY42R1-CAMS-RA | ECMWF-IFS        | 0.7031 × 0.7031                   |               | Rényy et al. (2019)                                               |
| GEOS-Chem-v11-01         | GEOS-Chem        | 1.978 × 2.5                       |               | Bey et al. (2001)                                                 |
| GEOS5-GOCART             | GEOS5-replay     | 0.5 × 0.5                         |               | Colarco et al. (2010)                                             |
| HadGEM3-GA7.1            | HadGEM           | 1.25 × 1.875                      |               |                                                                   |
| IMPACT                   | IMPACT           | 1.875 × 2.5                       |               |                                                                   |
| LMDZORINCA_v6            | INCA             | 1.259 × 2.5                       |               | Schulz et al. (2009); Wang et al. (2016)                          |
| OsloCTM3                 | OsloCTM          | 2.25 × 2.25                       | external BC   | Mýhre et al. (2009); Skete et al. (2011); Lund et al. (2018)      |
| MIROC5.9-SPRINTARS       | SPRINTARS        | 0.563 × 0.563                     |               | Takemura et al. (2000); Takemura (2005, 2012)                     |
| TM5                      | TM5              | 2 × 3                             |               | van Noije et al. (2014, 2021)                                     |

**Table S3.** Parameters perturbed in the ECHAM-HAM and UKESM1-A PPEs. Empty entries indicate parameter not perturbed. A few parameters are missing for UKESM1-A as they did not seem to matter in the current study.

| Process                                       | Parameter name |               | Comments                       |
|-----------------------------------------------|----------------|---------------|--------------------------------|
|                                               | ECHAM-HAM      | UKESM1-A      |                                |
| Fossil Fuel emissions                         | EMI_FF         |               |                                |
| Anthropogenic SO <sub>2</sub> emissions       | EMI_ANTH_SO2   | anth_so2      | 5 parameters for 5 regions     |
| Volcanic SO <sub>2</sub> emissions            |                | volc_so2      |                                |
| Dimethyl Sulfide emissions                    | EMI_DMS        | dms           |                                |
| Sea-salt emissions                            | EMI_SS         | sea_spray     |                                |
| Primary marine organic emissions              |                | prim_moc      |                                |
| Biomass Burning emissions                     | EMI_BB         |               |                                |
| BioFuel emissions                             | EMI_BF         |               |                                |
| Dust emissions                                | EMI_DUST       |               |                                |
| Biomass emitted particle size                 | EMI_CMR_BB     | carb_bb_diam  |                                |
| Biofuel emitted particle size                 | EMI_CMR_BF     |               |                                |
| Fossil fuel emitted particle size             | EMI_CMR_FF     | carb_ff_diam  |                                |
| Residential sources emitted particle size     |                | carb_res_diam |                                |
| Primary SO <sub>4</sub> emitted particle size |                | pim_so4_diam  | concerns only 50% of emissions |
| Width of Aitken mode                          |                | ait_width     |                                |
| Dry deposition rate Aitken mode               | DRYDEP_AIT     | dry_dep_ait   |                                |
| Dry deposition rate Accumulation mode         | DRYDEP_ACC     | dry_dep_acc   |                                |
| Dry deposition rate SO <sub>2</sub>           |                | dry_dep_so2   |                                |
| Dry deposition rate Coarse mode               | DRYDEP_COA     |               |                                |
| Wet deposition Below Cloud                    | WETDEP_BC      |               |                                |
| Wet deposition In Cloud                       | WETDEP_IC      |               |                                |
| Black Carbon Imaginary refractive index       | BC_RAD_NI      | bc_ri         |                                |
| Dust Imaginary refractive index               | DU_RAD_NI      |               |                                |
| All SO <sub>2</sub> chemistry reaction rates  | SO2REACTIONS   |               |                                |
| Biogenic monoterpene SOA production rate      |                | bvoc_soa      |                                |
| Nucleation rate in Boundary Layer             |                | bl_nuc        |                                |
| Nucleation rate in Free Troposphere           | NUC_FT         |               |                                |
| Cloud PH for aqueous chemistry                | PH_PERT        | cloud_ph      |                                |
| SO <sub>4</sub> hygroscopicity                | KAPPA_SO4      |               |                                |
| Organic carbon hygroscopicity                 |                | kappa_oc      |                                |
| Sea-salt hygroscopicity                       | KAPPA_SS       |               |                                |
| SO <sub>4</sub> layer thickness for aging     | SO4COATING     |               |                                |
| Ice fallspeed                                 |                | m_ci          |                                |
| Cloud top entrainment rate                    |                | a_ent_l_rp    |                                |

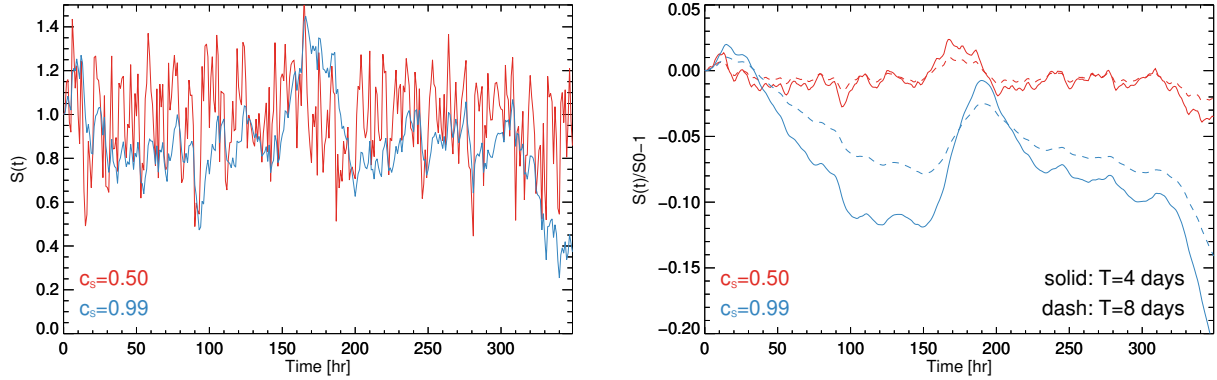

**Figure S1.** Examples of  $S(t)$  and  $m(t)$  generated from Eq. 6. The left panel shows two cases for  $S(t)$ , with either weakly correlated (red,  $c_S = 0.5$ ) or strongly correlated (blue,  $c_S = 0.99$ ) fluctuations. The right panel shows four cases of  $m(t)$ , for either a short (solid,  $T = 4$  d) or a long (dashed,  $T = 8$  d) life-time and either  $S(t)$  scenario. The decorrelation time can be obtained from the  $m(t)$  time-series and Eq. 4.

### S1 Simple box model for a source with a rectangular pulse

We will consider a system that is in equilibrium, but experiences a rectangular pulse in its source term of duration  $\Theta$ :

$$S(t) = \begin{cases} S_0 & \text{if } t < 0 \\ S_0 + \Delta S & \text{if } 0 \leq t \leq \Theta \\ S_0 & \text{if } t > \Theta \end{cases} \quad (\text{S1})$$

The solution of Eq. 6 is now:

$$5 \quad m(t) = \begin{cases} \frac{S_0}{k} & \text{if } t < 0 \\ \frac{S_0}{k} + \frac{\Delta S}{k} (1 - e^{-kt}) & \text{if } 0 \leq t \leq \Theta \\ \frac{S_0}{k} + \frac{\Delta S}{k} (e^{k\Theta} - 1) e^{-kt} & \text{if } t > \Theta \end{cases} \quad (\text{S2})$$

Obviously,  $\langle m(t) \rangle = \frac{S_0}{k}$ . By substituting  $m(t) = m'(t) + \frac{S_0}{k}$ , we can now rewrite Eq. 2 as:

$$\rho(\tau) = \frac{\langle m'(t)m'(t+\tau) \rangle}{\langle m'(t)^2 \rangle}, \quad (\text{S3})$$

where the denominator is a special case of the numerator, which is:

$$\langle m'(t)m'(t+\tau) \rangle = \lim_{\theta \rightarrow \infty} \frac{1}{2\theta} \int_{-\theta}^{\theta} m'(t)m'(t+\tau) dt. \quad (\text{S4})$$

10 We can ignore the  $\frac{1}{2\theta}$  as it occurs in both numerator and denominator, and concern ourselves with the integral only (which exists):

$$\langle m'(t)m'(t+\tau) \rangle \propto \int_{-\infty}^{\infty} m'(t)m'(t+\tau) dt. \quad (\text{S5})$$

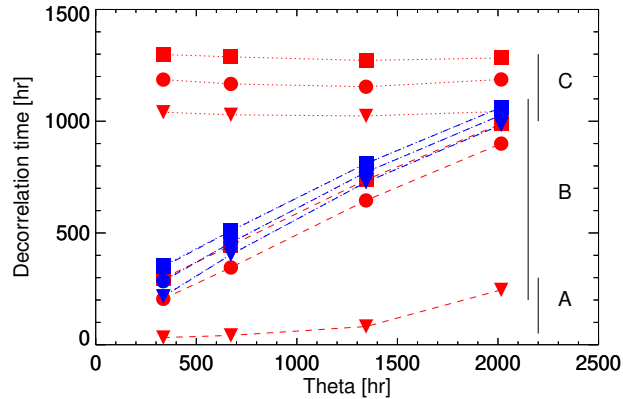

**Figure S2.** Decorrelation times  $\tau_m^*$  versus pulse duration  $\Theta$  (2, 4, 8 or 12 weeks) for several parameter combinations ( $c_S, T$ ) in the simplebox model Eq. 6. Shown are averages over a sample of 100 times-series. Linestyles indicate  $c_S$  (dashed: low correlation, dotted: high correlation). The symbols indicate lifetime  $T$  (triangle: 1 day, circle: 6 days, square: 10 days). Colors indicate ratio of pulse amplitude to source fluctuations (red: 0.1, blue: 10). We distinguish three "regimes". A: uncorrelated fluctuations that are larger than the pulse; decorrelation time depends on lifetime with influence from pulse width. B: pulse amplitude is larger than fluctuations; decorrelation time is dominated by pulse width. C: correlated fluctuations that are larger than the pulse; decorrelation time is dominated by the source fluctuations. Note that in all three regimes, there is usually a clear separation between different lifetimes, allowing them to be estimated if sufficient extra information on  $S(t)$  is available.

For  $\tau < \Theta$ , this results in

$$\begin{aligned}
 & \langle m'(t)m'(t+\tau) \rangle \propto \\
 & \frac{\Delta S^2}{k^3} \left\{ k\Theta - k\tau - \frac{1}{2}(1 - e^{-k\Theta}) - \right. \\
 15 \quad & \left. (1 - e^{k\Theta} - \frac{1}{2}e^{-k\Theta}) e^{-k\tau} - \frac{1}{2}e^{-k\Theta} e^{k\tau} \right\}
 \end{aligned} \tag{S6}$$

while for  $\tau \geq \Theta$  we find:

$$\begin{aligned}
 & \langle m'(t)m'(t+\tau) \rangle \propto \\
 & \frac{\Delta S^2}{k^3} (1 - e^{-k\Theta}) (1 - e^{k\Theta}) e^{-k\tau}
 \end{aligned} \tag{S7}$$

From the latter relation we obtain ( $\tau \geq \Theta$ ):

$$20 \quad \rho(\tau) = e^{-k\tau} \tag{S8}$$

Note that if  $\Theta > T = \frac{1}{k}$ , the decorrelation time will be determined by Eq. S6 and not by Eq. S7.

## S2 Impact from satellite sampling

The sampling of satellite data has a substantial effect on autocorrelations, just as it has on AOD (Schutgens et al., 2016). In this section we briefly discuss how sampling affects autocorrelations in three different ways. To assess sampling impacts we will use the ECMWF-IFS model as a truth, which may then be sampled according to a satellite product.

First, there is a difference in the autocorrelation calculated from the full AOD data from ECMWF-IFS compared to the autocorrelation from ECMWF-IFS AOD sampled to a particular satellite product. The first is the autocorrelation we ideally

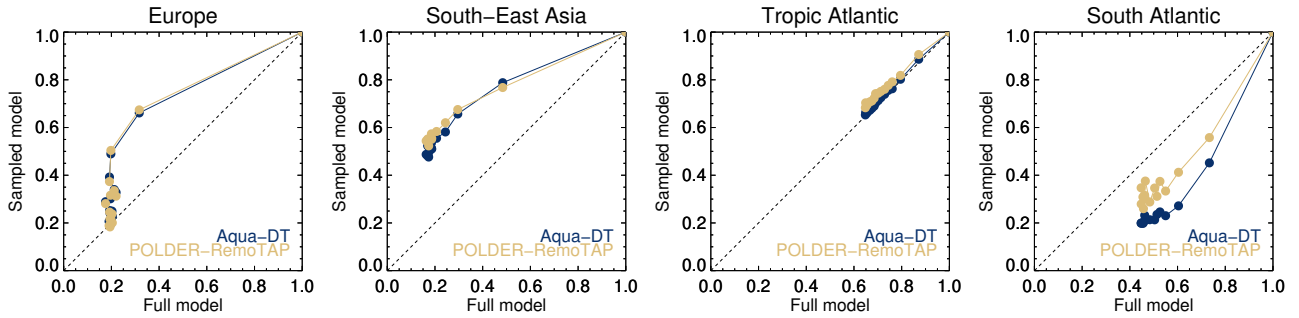

**Figure S3.** Impact of satellite sampling on autocorrelations at various lags (0-14 days). Each dot is the autocorrelation at a certain lag, the lines connect increasing lags (starting at (1,1) for a lag of zero). The autocorrelations are calculated from a synthetic truth (ECMWF-IFS model), using either the full model data (horizontal axis) or only the model data sampled to a satellite dataset (vertical axis, either RemoTAP or Aqua-DT). The dashed black line represents  $y = x$ . Only autocorrelations calculated over at least 30 datapoints are shown.

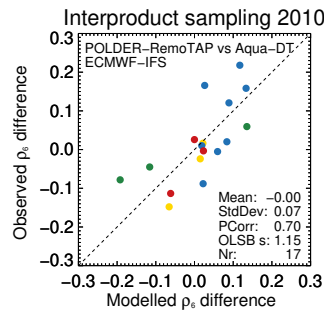

**Figure S4.** Impact of sampling on autocorrelations (at a lag of 6 days) for two different satellite products in 2010. The vertical axis shows the difference in  $\rho_6$  for RemoTAP vs Aqua-DT (each product uses its own sampling). The horizontal axis shows the difference in  $\rho_6$  for ECMWF-IFS, sampled to either RemoTAP or Aqua-DT. Each dot is  $\rho_6$  for a particular region. Colours indicate regions (red: deserts, blue: ocean, green: biomass burning, yellow: North America, Europe, South-East Asia). The dashed black line represents  $y = x$ . Only autocorrelations calculated over at least 30 datapoints are shown.

want to know, the second is the autocorrelation we can actually observe. We note substantial differences, see Fig. S3. In general these differences result from the satellite not sampling the full diurnal cycle and not sampling the entire domain even at overpass. For many regions, results for RemoTAP and Aqua-DT are quite similar, even though the first product has substantially less observations. The relationships between  $\rho$  for the sampled and full dataset are nearly monotonically and often fairly linearly increasing, suggesting that the sampled dataset contains information about the full dataset.

Second, although it is not readily visible in the previous figure, there is a difference between autocorrelations from either RemoTAP or Aqua-DT, related to their sampling as is shown in Fig. S4. This analysis suggest that about 50% ( $PCorr^2 = 0.49$ ) of the difference in observed  $\rho$  is due to different orbits, swath widths, over pass times and pixel masking, all issues that determine the final sampling of a satellite product. We surmise the remaining 50% can be explained from observational errors in RemoTAP and Aqua-DT, which will be different, see Sect. 5 and 6, as well as errors in ECMWF-IFS to accurately model autocorrelations.

Third, there is a year-to-year variation in sampling that also leads to differences, see Fig. S5. The left two figures show that the year-to-year variation that might be observed in satellite products is not related to natural variation from year to year. The right two figures show that this year-to-year variation can to a significant extent be explained by satellite sampling, especially for RemoTAP which has, on the whole, less observations than Aqua-DT. This suggests that most of the variation seen from

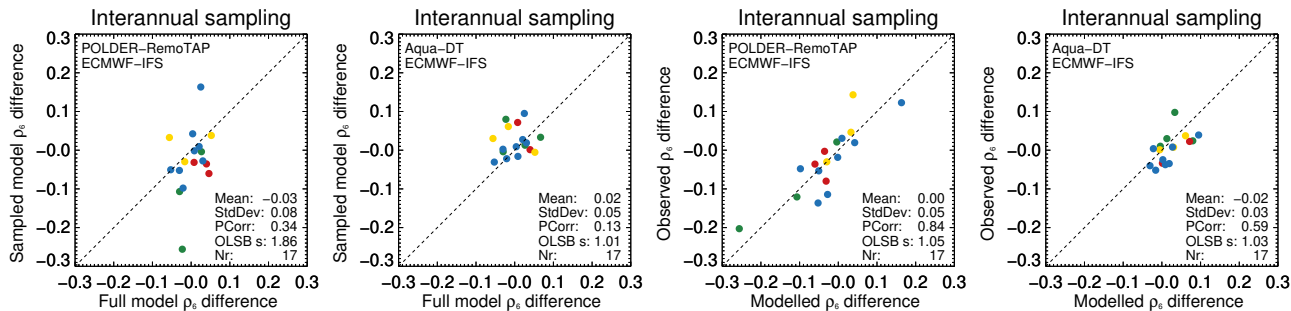

**Figure S5.** Impact of sampling from year to year on autocorrelations (at a lag of 6 days). The left two figures show a study based on only model data. The vertical axis shows autocorrelations calculated from sampled model data (sampled to a specific satellite product). The horizontal axis shows autocorrelations calculated from the full model data. The right two figures show a study based on both satellite observed and modelled autocorrelations (model was sampled to satellite product). In all cases what is shown is the autocorrelation in 2010 minus the autocorrelation in 2008. Each dot is  $\rho_6$  for a particular region. Colours indicate regions (red: deserts, blue: ocean, green: biomass burning, yellow: North America, Europe, South-East Asia). The dashed black line represents  $y = x$ . Only autocorrelations calculated over at least 30 datapoints are shown.

year-to-year (Fig. 13 and 14) does not indicate natural variation. For Aqua-DT, which has many more observations, interannual differences are substantially smaller but can still to some extent be explained by sampling.

45 While satellite sampling can thus have a substantial impact on autocorrelations, proper collocation (see Sect. 2.5) of data ensures that the evaluation of satellite observed and modelled autocorrelations is possible.

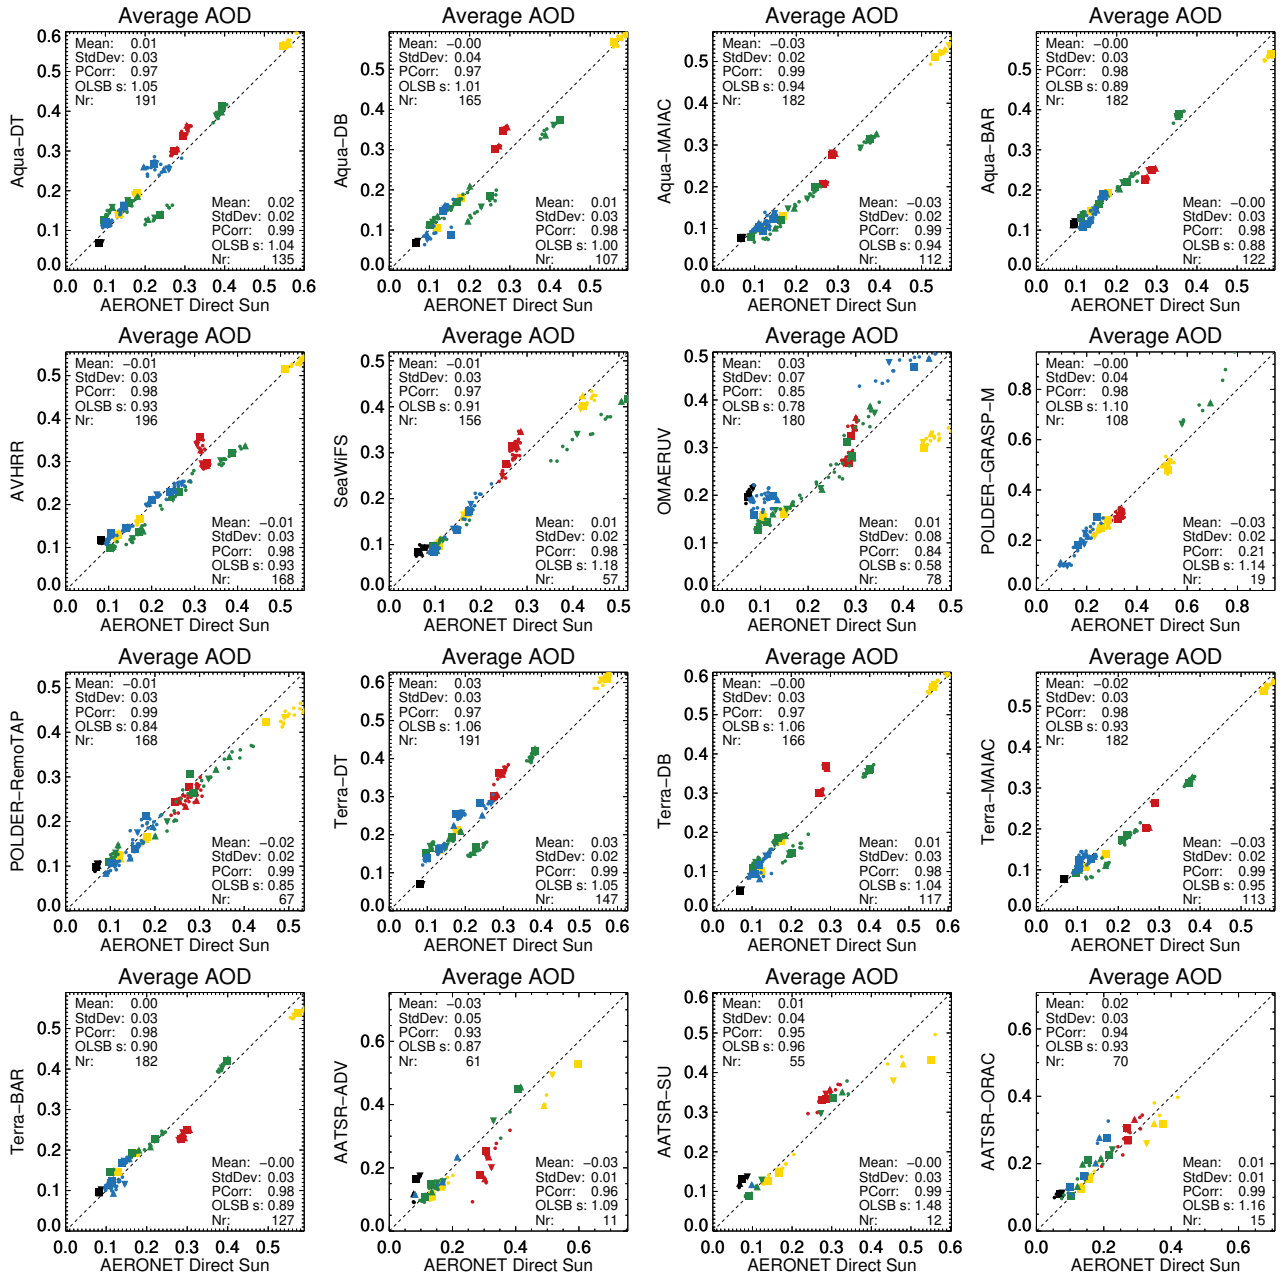

**Figure S6.** Evaluation of satellite observed regional averaged AOD with AERONET. Each symbol is the regional AOD for a specific region and lag. These autocorrelations are only shown if at least 30 data pairs were available to calculate autocorrelations. Colours indicate regions (red: deserts, blue: ocean, green: biomass burning, yellow: North America, Europe, South-East Asia, black: Australia). Symbols indicate lags (upward triangle: 3 days, square: 6 days, downward triangle: 9 days, dots: all other lags from 1 to 14 days). Statistics are shown for symbols based on at least 30 data pairs (upper left) or 300 (lower right, not shown for GRASP due to paucity of data). The mean, standard deviation, Pearson correlation and an unbiased slope estimate (OLSB) are shown for relevant symbols (Nr in total). The dashed black line represents  $y = x$ .

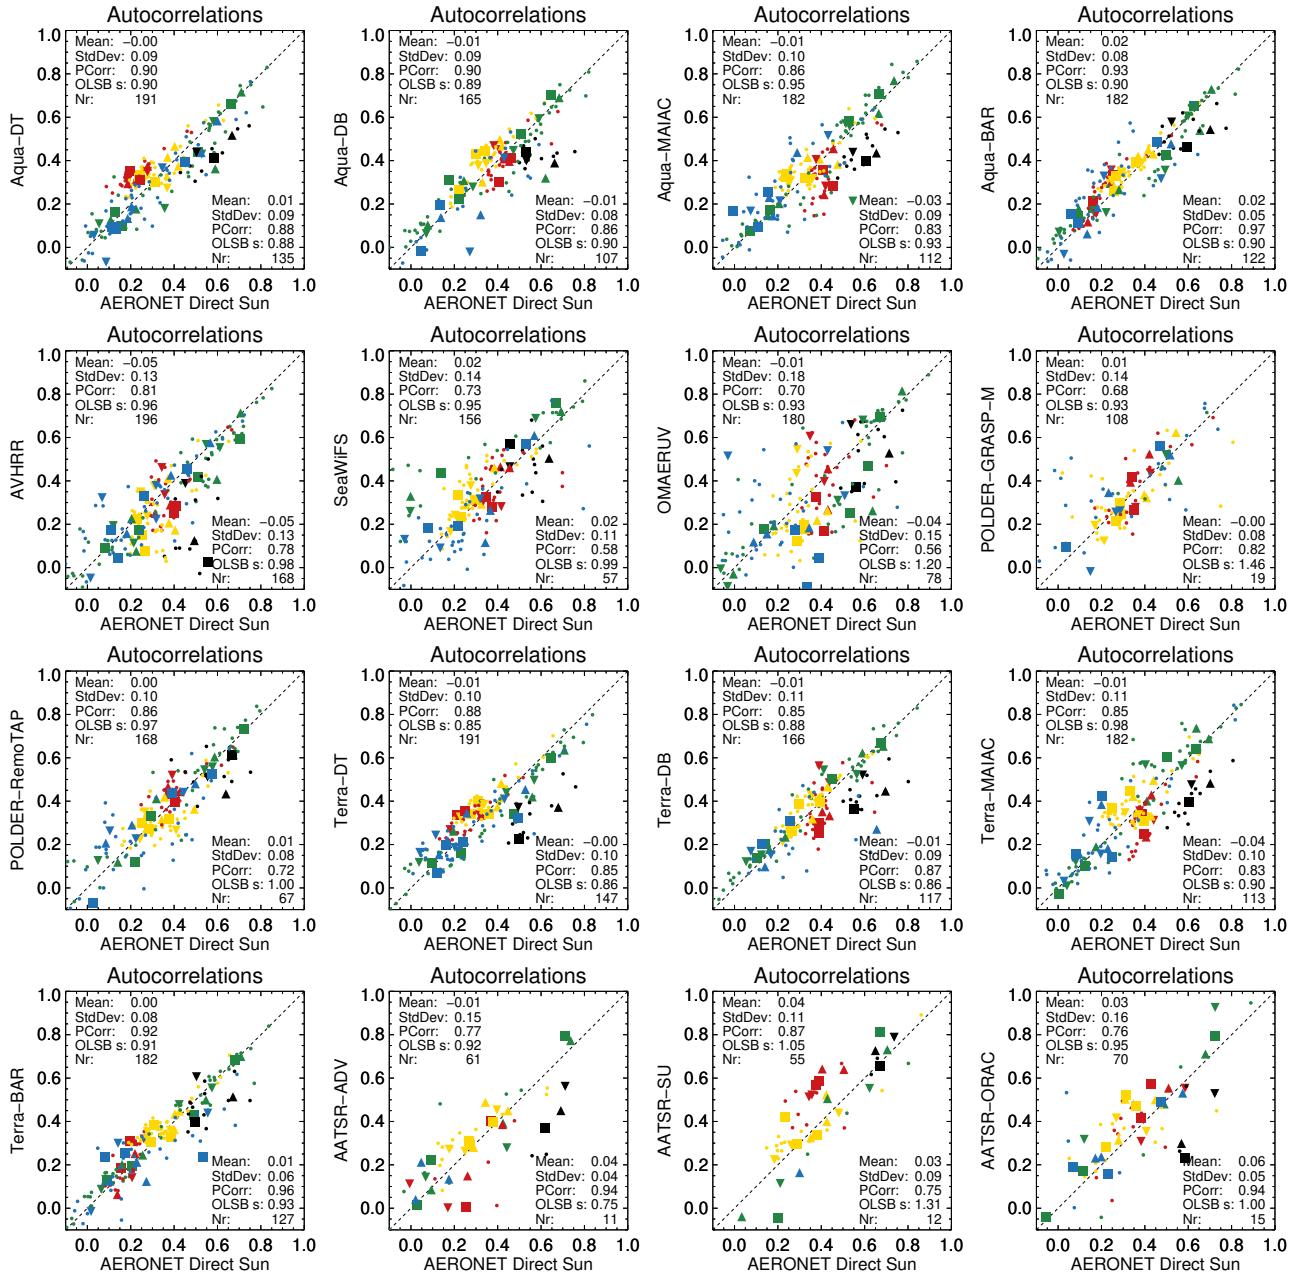

**Figure S7.** Evaluation of satellite observed autocorrelations with AERONET. Each symbol is the correlation for a specific region and lag. For more explanation, see the caption to Fig. S6

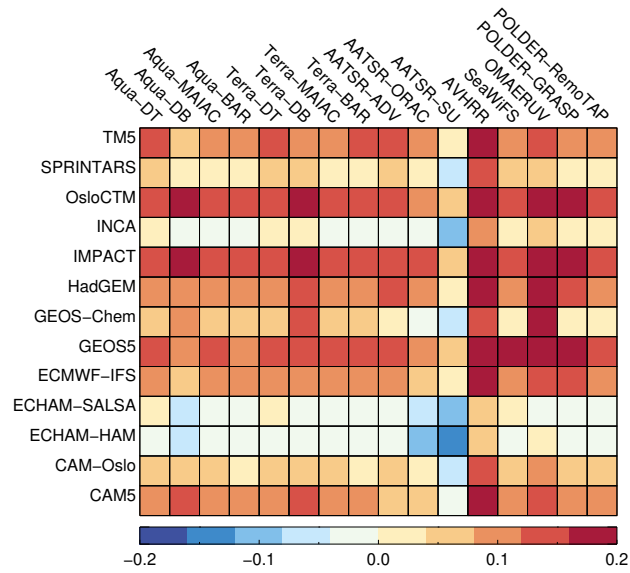

**Figure S8.** Model bias in autocorrelation at a lag of 6 days for all satellite products, as in Fig. 17. The models have been collocated to each product separately. Only region/lag cases with at least 3000 data pairs were used.

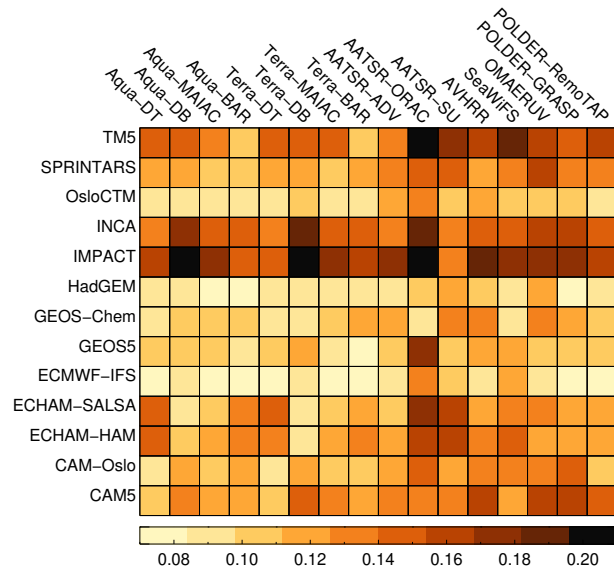

**Figure S9.** Standard deviation of the errors in model autocorrelation at a lag of 6 days for all satellite products, as in Fig. 17. The models have been collocated to each product separately. Only region/lag cases with at least 3000 data pairs were used.

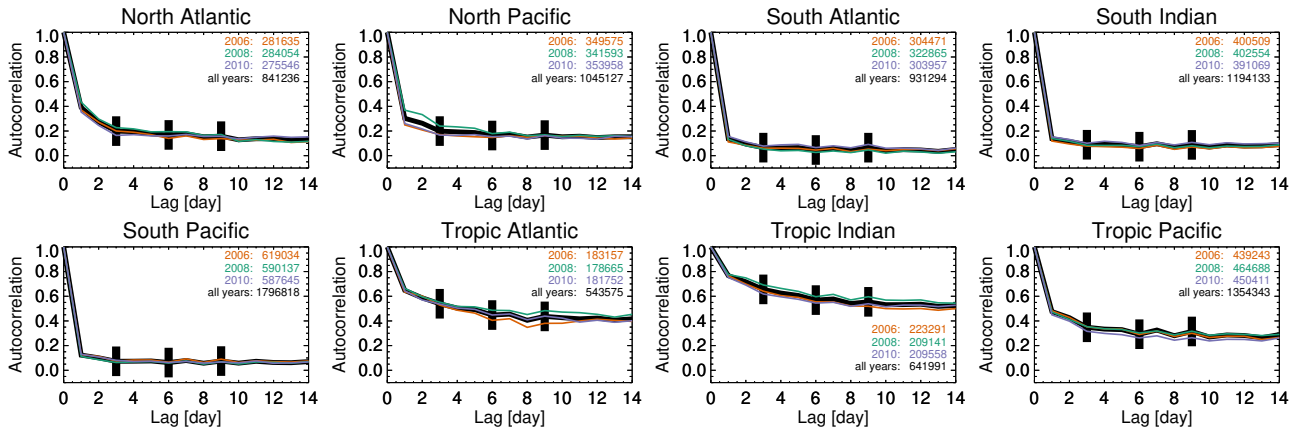

**Figure S10.** Temporal autocorrelations for a 3-year climatology from Aqua-DT (black) and the individual years (colors), for selected ocean regions. Also shown, for lags of 3, 6 and 9 days, are the  $\sigma$  uncertainty estimates from Sect. 6.

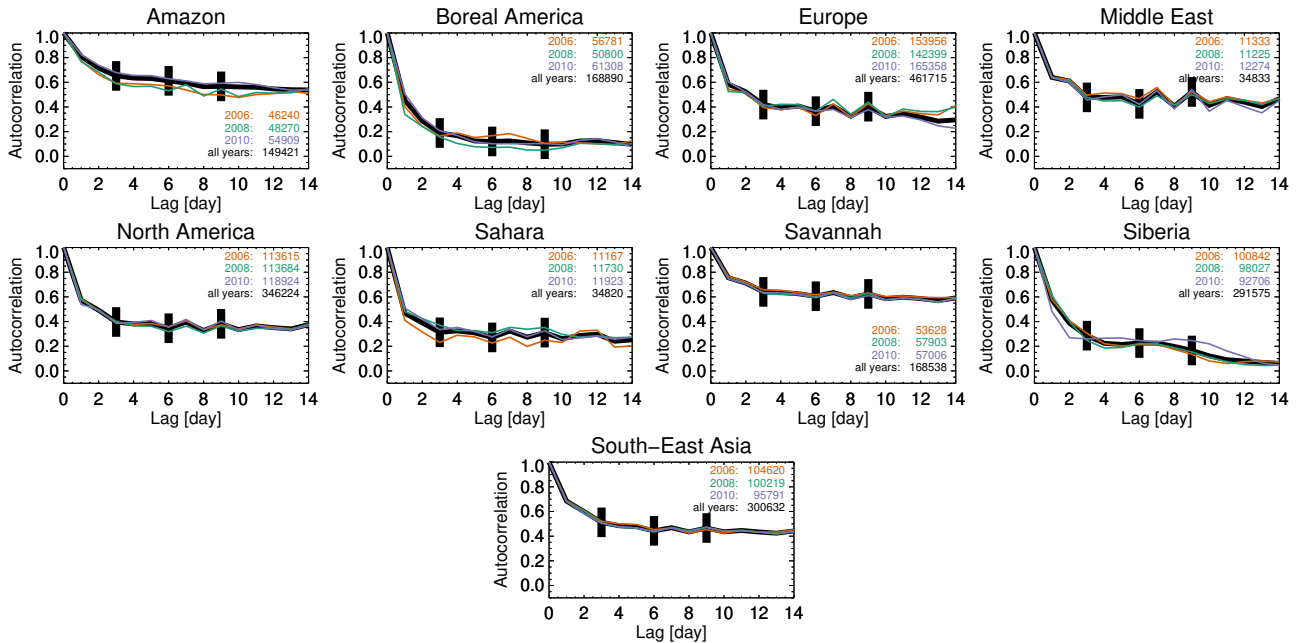

**Figure S11.** Temporal autocorrelations for a 3-year climatology from Aqua-DT (black) and the individual years (colors), for selected land regions. Also shown, for lags of 3, 6 and 9 days, are the  $\sigma$  uncertainty estimates from Sect. 6.

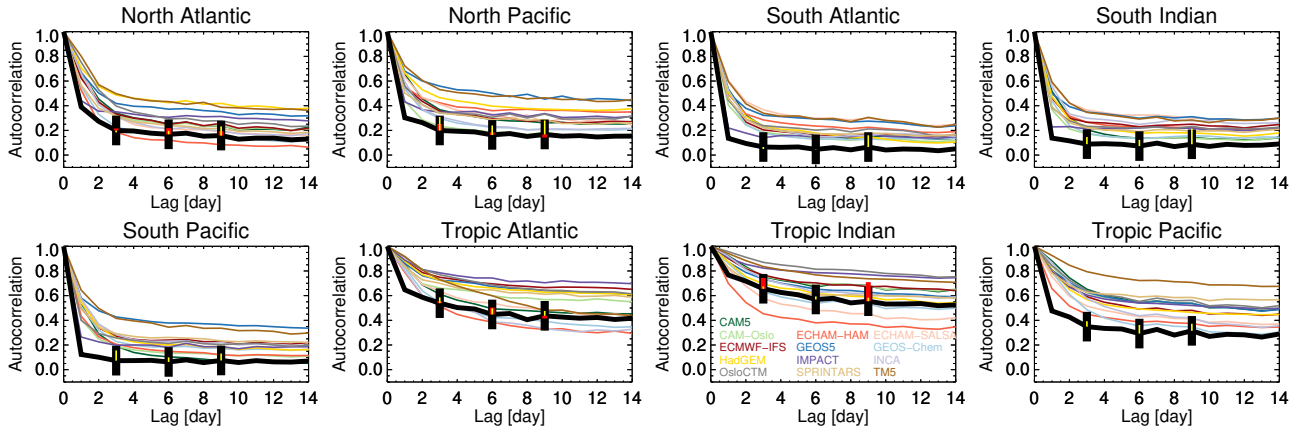

**Figure S12.** Temporal autocorrelations for AEROCOM models (colours) and Aqua-DT (black), for selected ocean regions. Also shown, for lags of 3, 6 and 9 days, are the  $3\sigma$  uncertainty estimates from Sect. 6, as well as errors vs AERONET (in red, from Sect. 5) and Aqua-BAR (in yellow, from Sect. 6). Note that these uncertainties and errors were estimate for different sampling of Aqua-DT.

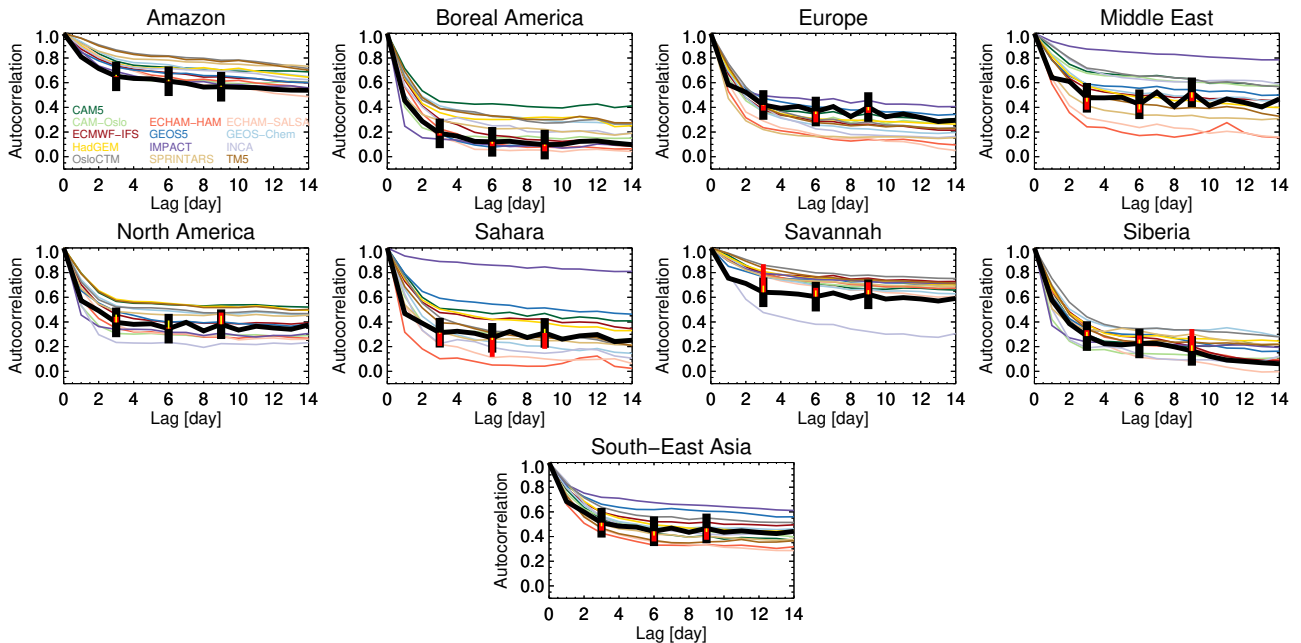

**Figure S13.** Temporal autocorrelations for AEROCOM models (colours) and Aqua-DT (black), for selected land regions. Also shown, for lags of 3, 6 and 9 days, are the  $3\sigma$  uncertainty estimates from Sect. 6, as well as errors vs AERONET (in red, from Sect. 5) and Aqua-BAR (in yellow, from Sect. 6). Note that these uncertainties and errors were estimate for different sampling of Aqua-DT.

## References

- Ahn, C., Torres, O., and Jethva, H.: Assessment of OMI near-UV aerosol optical depth over land, *Journal of Geophysical Research : Atmospheres*, 119, 2457–2473, <https://doi.org/10.1002/2013JD020188>. Received, 2014.
- 50 Bergman, T., Kerminen, V., Korhonen, H., Lehtinen, K. J., Makkonen, R., Arola, A., and Mielonen, T.: Model Development Evaluation of the sectional aerosol microphysics module SALSA implementation in ECHAM5-HAM aerosol-climate model, *Geoscientific Model Development*, 5, 845–868, <https://doi.org/10.5194/gmd-5-845-2012>, 2012.
- Bevan, S. L., North, P. R. J., Los, S. O., and Grey, W. M. F.: Remote Sensing of Environment A global dataset of atmospheric aerosol optical depth and surface reflectance from AATSR, *Remote Sensing of Environment*, 116, 199–210, <https://doi.org/10.1016/j.rse.2011.05.024>, 2012.
- 55 Bey, I., Jacob, D. J., Yantosca, R. M., Logan, J. A., Field, B. D., Fiore, A. M., Li, Q., Liu, H. Y., Mickley, L. J., and Schultz, M. G.: Global modeling of tropospheric chemistry with assimilated meteorology : Model description and evaluation, *Journal of Geophysical Research: Atmospheres*, 106, 73–95, 2001.
- Chen, C., Dubovik, O., Fuertes, D., Litvinov, P., Lapyonok, T., Lopatin, A., Ducos, F., Derimian, Y., Herman, M., Tanré, D., Remer, L. A., Lyapustin, A., Sayer, A. M., Levy, R. C., Hsu, N. C., Descloitres, J., Li, L., Torres, B., Karol, Y., Herrera, M., Herreras, M., Aspetsberger, M., Wanzenboeck, M., Bindreiter, L., Marth, D., Hangler, A., and Federspiel, C.: Validation of GRASP algorithm product from POLDER / PARASOL data and assessment of multi-angular polarimetry potential for aerosol monitoring, *Earth System Science Data*, 12, 3573–3620, <https://doi.org/10.5194/essd-12-3573-2020>, 2020.
- 60 Colarco, P., Silva, A., Chin, M., and Diehl, T.: Online simulations of global aerosol distributions in the NASA GEOS - 4 model and comparisons to satellite and ground - based aerosol optical depth, *Journal of Geophysical Research : Atmospheres*, 115, <https://doi.org/10.1029/2009JD012820>, 2010.
- Dubovik, O., Herman, M., Holdak, A., Lapyonok, T., Tanré, D., Deuzé, J. L., Ducos, F., Sinyuk, A., and Lopatin, A.: Statistically optimized inversion algorithm for enhanced retrieval of aerosol properties from spectral multi-angle polarimetric satellite observations, *Atmospheric Measurement Techniques*, 4, 975–1018, <https://doi.org/10.5194/amt-4-975-2011>, 2011.
- 70 Ghan, S. J., Liu, X., Easter, R. C., Zaveri, R., Rasch, P. J., Yoon, J.-H., and Eaton, B.: Toward a Minimal Representation of Aerosols in Climate Models: Comparative Decomposition of Aerosol Direct, Semidirect, and Indirect Radiative Forcing, *Journal of Climate*, 25, 6461–6476, <https://doi.org/10.1175/JCLI-D-11-00650.1>, 2012.
- Hasekamp, O., Litvinov, P., Fu, G., Chen, C., and Dubovik, O.: Algorithm evaluation for polarimetric remote sensing of atmospheric aerosols, *Atmospheric Measurement Techniques*, 17, 1497–1525, <https://doi.org/10.5194/amt-17-1497-2024>, 2024.
- 75 Hsu, N., Lee, J., Sayer, A., Carletta, N., Chen, S.-H., Tucker, C., Holben, B., and Tsay, S.-C.: Retrieving near-global aerosol loading over land and ocean from AVHRR, *Journal of Geophysical Research : Atmospheres*, 122, 9968–9989, <https://doi.org/10.1002/2017JD026932>, 2017.
- Hsu, N., Lee, J., Sayer, A., Kim, W., Bettenhausen, C., and Tsay, S.-C.: VIIRS Deep Blue Aerosol Products Over Land : Extending the EOS Long - Term Aerosol Data Records, *Journal of Geophysical Research : Atmospheres*, 124, 4026–4053, <https://doi.org/10.1029/2018JD029688>, 2019.
- 80 Hsu, N. C., Jeong, M., Bettenhausen, C., Sayer, A. M., Hansell, R., Seftor, C. S., Huang, J., and Tsay, S.: Enhanced Deep Blue aerosol retrieval algorithm : The second generation, *Journal of Geophysical Research : Atmospheres*, 118, 9296–9315, <https://doi.org/10.1002/jgrd.50712>, 2013.
- Jethva, H., Torres, O., and Ahn, C.: Global assessment of OMI aerosol single-scattering albedo using ground-based AERONET inversion, *Journal of Geophysical Research : Atmospheres*, 119, 9020–9040, <https://doi.org/10.1002/2014JD021672>, 2014.
- 85 Kirkevåg, A., Grini, A., Olivieri, D., Øyvind Seland, Alterskjær, K., Hummel, M., Karset, I. H. H., Lewinschal, A., Liu, X., Makkonen, R., Bethke, I., Griesfeller, J., and Schulz, M.: A production-tagged aerosol module for Earth system models , OsloAero5.3 – extensions and updates for CAM5.3-Oslo, *Geoscientific Model Development*, 11, 3945–3982, 2018.
- Kokkola, H., Kühn, T., Laakso, A., Bergman, T., Lehtinen, K. E. J., Mielonen, T., Arola, A., Stadtler, S., Korhonen, H., Ferrachat, S., Lohmann, U., Neubauer, D., Tegen, I., Drian, C. S.-L., Schultz, M. G., Bey, I., Stier, P., Daskalakis, N., Heald, C. L., and Romakkaniemi, S.: SALSA2 . 0 : The sectional aerosol module of the aerosol – chemistry – climate model ECHAM6 . 3 . 0-HAM2 . 3-MOZ1 . 0, *Geoscientific Model Development*, pp. 3833–3863, 2018.
- Lipponen, A., Mielonen, T., Pitkänen, M. R. A., Levy, R. C., and Sawyer, V. R.: Bayesian aerosol retrieval algorithm for MODIS AOD retrieval over land, *Atmospheric Measurement Techniques*, 11, 1529–1547, 2018.
- 95 Liu, X., Easter, R. C., Ghan, S. J., Zaveri, R., Rasch, P., Shi, X., Lamarque, J.-F., Gettelman, A., Morrison, H., Vitt, F., Conley, A., Park, S., Neale, R., Hannay, C., a. M. L. Ekman, Hess, P., Mahowald, N., Collins, W., Iacono, M. J., Bretherton, C. S., Flanner, M. G., and Mitchell, D.: Toward a minimal representation of aerosols in climate models: description and evaluation in the Community Atmosphere Model CAM5, *Geoscientific Model Development*, 5, 709–739, <https://doi.org/10.5194/gmd-5-709-2012>, 2012.

- Lohmann, U., Stier, P., Hoose, C., Ferrachat, S., Kloster, S., Roeckner, E., and Zhang, J.: Cloud microphysics and aerosol indirect effects in the global climate model ECHAM5-HAM, *Atmospheric Chemistry and Physics*, 7, 3425–3446, <https://doi.org/10.5194/acp-7-3425-2007>, 2007.
- Lu, S., Landgraf, J., Fu, G., van Dierenhoven, B., Wu, L., Rusli, S. P., and Hasekamp, O. P.: Simultaneous Retrieval of Trace Gases, Aerosols, and Cirrus Using RemoTAP—The Global Orbit Ensemble Study for the CO2M Mission, *Frontiers in Remote Sensing*, 3, <https://doi.org/10.3389/frsen.2022.914378>, 2022.
- 105 Lund, M. T., Myhre, G., Haslerud, A. S., Skeie, R. B., and Griesfeller, J.: Concentrations and radiative forcing of anthropogenic aerosols from 1750 to 2014 simulated with the Oslo CTM3 and CEDS emission inventory, *Geoscientific Model Development*, 11, 4909–4931, 2018.
- Lyapustin, A., Wang, Y., Korkin, S., and Huang, D.: MODIS Collection 6 MAIAC algorithm, *Atmospheric Measurement Techniques*, 11, 5741–5765, 2018.
- 110 Myhre, G., Berglen, T. F., Johnsrud, M., Hoyle, C. R., Berntsen, T. K., a. Christopher, S., Fahey, D. W., a. Isaksen, I. S., a. Jones, T., a. Kahn, R., Loeb, N., Quinn, P., Remer, L., Schwarz, J. P., and Yttri, K. E.: Modelled radiative forcing of the direct aerosol effect with multi-observation evaluation, *Atmospheric Chemistry and Physics*, 9, 1365–1392, <https://doi.org/10.5194/acp-9-1365-2009>, 2009.
- North, P. R. J.: Estimation of aerosol opacity and land surface bidirectional reflectance from ATSR-2 dual-angle imagery : Operational method and validation, *Journal of Geophysical Research: Atmospheres*, 107, 2002.
- 115 North, P. R. J., Briggs, S. A., Plummer, S. E., and Settle, J. J.: Retrieval of Land Surface Bidirectional Reflectance and Aerosol Opacity from ATSR-2 Multiangle Imagery, *IEEE Trans. on Geoscience and Remote Sensing*, 37, 526–537, 1999.
- Remer, L., Kaufman, Y., Tanre, D., Mattoo, S., Chu, D., Martins, J., Li, R.-R., Ichoku, C., Levy, R., Kleidman, R., Eck, T., Vermote, E., and Holben, B.: The MODIS Aerosol Algorithm, Products, and Validation, *J. Atmospheric Sciences*, 62, 947 – 973, 2005.
- Rémy, S., Kipling, Z., Flemming, J., Boucher, O., Nabat, P., Michou, M., Bozzo, A., Ades, M., Huijnen, V., Benedetti, A., Engelen, R., and henri Peuch, V.: Description and evaluation of the tropospheric aerosol scheme in the European Centre for Medium-Range Weather Forecasts ( ECMWF ) Integrated Forecasting System ( IFS-AER , cycle 45R1 ), *Geoscientific Model Development*, 12, 4627–4659, 2019.
- 120 Sayer, A. M., Hsu, N. C., Bettenhausen, C., Ahmad, Z., Holben, B. N., Smirnov, A., Thomas, G. E., and Zhang, J.: SeaWiFS Ocean Aerosol Retrieval ( SOAR ): Algorithm , validation , and comparison with other data sets, *Journal of Geophysical Research : Atmospheres*, 117, 1–17, <https://doi.org/10.1029/2011JD016599>, 2012a.
- 125 Sayer, A. M., Hsu, N. C., Bettenhausen, C., Holben, B. N., Zhang, J., Technology, E. S., Forks, G., and Dakota, N.: Global and regional evaluation of over-land spectral aerosol optical depth retrievals from SeaWiFS, *Atmospheric Measurement Techniques*, 5, 1761–1778, <https://doi.org/10.5194/amt-5-1761-2012>, 2012b.
- Sayer, A. M., Hsu, N. C., Lee, J., Carletta, N., Chen, S.-H., and Smirnov, A.: Evaluation of NASA Deep Blue / SOAR aerosol retrieval algorithms applied to AVHRR measurements, *Journal of Geophysical Research : Atmospheres*, 122, 9945–9967, <https://doi.org/10.1002/2017JD026934>, 2017.
- 130 Sayer, A. M., Hsu, N. C., Dutcher, S. T., and Lee, J.: Validation , Stability , and Consistency of MODIS Collection 6 . 1 and VIIRS Version 1 Deep Blue Aerosol Data Over Land, *Journal of Geophysical Research : Atmospheres*, 124, 4658–4688, <https://doi.org/10.1029/2018JD029598>, 2019.
- Schulz, M., Cozic, A., and Szopa, S.: LMDzT-INCA dust forecast model developments and associated validation efforts, *IOP Conference Series: Earth and Environmental Science*, 7, 012 014, <https://doi.org/10.1088/1755-1307/7/1/012014>, 2009.
- 135 Schutgens, N., Partridge, D. G., and Stier, P.: The importance of temporal collocation for the evaluation of aerosol models with observations, *Atmospheric Chemistry and Physics*, 16, 1065–1079, <https://doi.org/10.5194/acp-16-1065-2016>, 2016.
- Skeie, R. B., Berntsen, T. K., Myhre, G., Tanaka, K., and Kvalev, M. M.: Anthropogenic radiative forcing time series from pre-industrial times until 2010, *Atmospheric Chemistry and Physics*, 11, 11 827–11 857, <https://doi.org/10.5194/acp-11-11827-2011>, 2011.
- 140 Sogacheva, L., Kolmonen, P., Virtanen, T. H., Rodriguez, E., Saponaro, G., and de Leeuw, G.: Post-processing to remove residual clouds from aerosol optical depth retrieved using the Advanced Along Track Scanning Radiometer, *Atmospheric Measurement Techniques*, 10, 491–505, <https://doi.org/10.5194/amt-10-491-2017>, 2017.
- Stier, P., Feichter, J., Kinne, S., Kloster, S., Vignati, E., Wilson, J., Ganzeveld, L., Tegen, I., and Werner, M.: The aerosol-climate model ECHAM5-HAM, *Atmospheric Chemistry and Physics*, 5, 1125–1156, 2005.
- 145 Takemura, T.: Simulation of climate response to aerosol direct and indirect effects with aerosol transport-radiation model, *Journal of Geophysical Research*, 110, D02 202, <https://doi.org/10.1029/2004JD005029>, 2005.
- Takemura, T.: Distributions and climate effects of atmospheric aerosols from the preindustrial era to 2100 along Representative Concentration Pathways (RCPs) simulated using the global aerosol model SPRINTARS, *Atmospheric Chemistry and Physics*, 12, 11 555–11 572, <https://doi.org/10.5194/acp-12-11555-2012>, 2012.

- 150 Takemura, T., Okamoto, H., Maruyama, Y., Numaguti, A., Higurashi, A., and Nakajima, T.: Global three-dimensional simulation of aerosol optical thickness distribution of various origins, *Journal of Geophysical Research*, 105, 17 853, <https://doi.org/10.1029/2000JD900265>, 2000.
- Thomas, G. E., Carboni, E., Sayer, A. M., Poulsen, C. A., Siddans, R., and Grainger, R. G.: Oxford-RAL Aerosol and Cloud (ORAC): aerosol retrievals from satellite radiometers, pp. 193–224, Springer, 2009.
- 155 van Noije, T., Bergman, T., Sager, P. L., O'Donnell, D., Makkonen, R., Gonçalves-Ageitos, M., Döscher, R., Fladrich, U., Hardenberg, J. V., Keskinen, J. P., Korhonen, H., Laakso, A., Myriokefalitakis, S., Ollinaho, P., Garcíá-Pando, C. P., Reerink, T., Schrödner, R., Wyser, K., and Yang, S.: EC-Earth3-AerChem: A global climate model with interactive aerosols and atmospheric chemistry participating in CMIP6, *Geoscientific Model Development*, 14, 5637–5668, <https://doi.org/10.5194/gmd-14-5637-2021>, 2021.
- van Noije, T. P. C., Sager, P. L., Segers, A. J., Velthoven, P. F. J. V., Krol, M. C., Hazeleger, W., and Williams, A. G.: Simulation of tropospheric chemistry and aerosols with the climate model EC-Earth, *Geoscientific Model Development*, pp. 2435–2475, <https://doi.org/10.5194/gmd-7-2435-2014>, 2014.
- 160 Wang, R., Balkanski, Y., Boucher, O., Ciais, P., Schuster, G. L., Chevallier, F., Samset, B. H., Liu, J., Piao, S., Valari, M., and Tao, S.: Estimation of global black carbon direct radiative forcing and its uncertainty constrained by observations, *Journal of Geophysical Research*, 121, 5948–5971, <https://doi.org/10.1002/2015JD024326>, 2016.
- 165 Zhang, K., O'Donnell, D., Kazil, J., Stier, P., Kinne, S., Lohmann, U., Ferrachat, S., Croft, B., Quaas, J., Wan, H., Rast, S., and Feichter, J.: The global aerosol-climate model ECHAM-HAM, version 2: Sensitivity to improvements in process representations, *Atmospheric Chemistry and Physics*, 12, 8911–8949, <https://doi.org/10.5194/acp-12-8911-2012>, 2012.
